# Supplementary material for: Tunable phosphorization degree of CoxPy@N,P-doped carbon as a highly-active bifunctional electrocatalyst for rechargeable zinc–air batteries
Source: Royal Society of Chemistry journal article supplement (doi:10.1039/d3cy00287j), 2023-01-01
Supplement: d3cy00287j1.pdf [file d3cy00287j1.pdf]

## Tunable phosphorization degree of $\text{Co}_x\text{P}_y@N,P$ -doped carbon as a highly-active bifunctional electrocatalyst for rechargeable Zinc-air batteries

Yang Liu<sup>a</sup>, Chen Li<sup>a</sup>, Min Yuan<sup>a</sup>, Xinghao Zhang<sup>a</sup>, Haikuo Lan<sup>a</sup>, Yuting Chen<sup>a</sup>,  
Minge Tian<sup>d</sup>, Kang Liu<sup>\*a,c</sup>, Lei Wang<sup>\*a,b</sup>

a Y. Liu, C. Li, M. Yuan, X. Zhang, Y. Chen, Prof. K. Liu, Prof. L. Wang  
Key Laboratory of Eco-chemical Engineering, Taishan Scholar Advantage and  
Characteristic Discipline Team of Eco-Chemical Process and Technology, College of  
Chemistry and Molecular Engineering, Qingdao University of Science and  
Technology, Qingdao 266042, China.

b Prof. L. Wang

College of Environment and Safety Engineering, Qingdao University of Science and  
Technology, Qingdao 266042, China.

c Prof. K. Liu

Chaofeng Steel Structure Group Co., Ltd., Hangzhou 311215, China.

d M. Tian

Scientific Green(shandong) Environmental Technology Co.Ltd, Jining Economic  
Development Zone, Shandong Province, 272499, China.

E-mail: liukang82@126.com; inorchemwl@126.com.

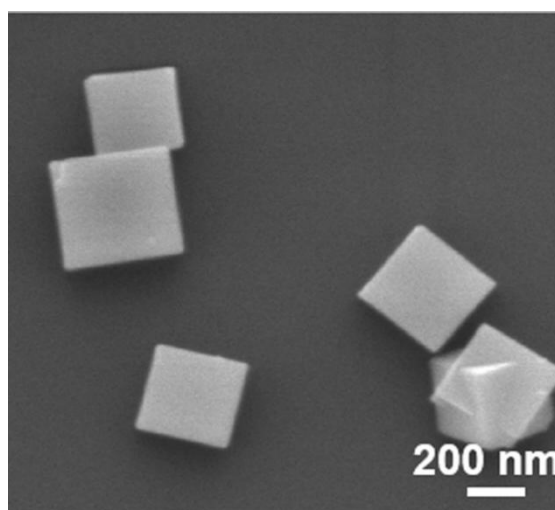

**Figure S1.** The SEM image of CoCo-PBA.

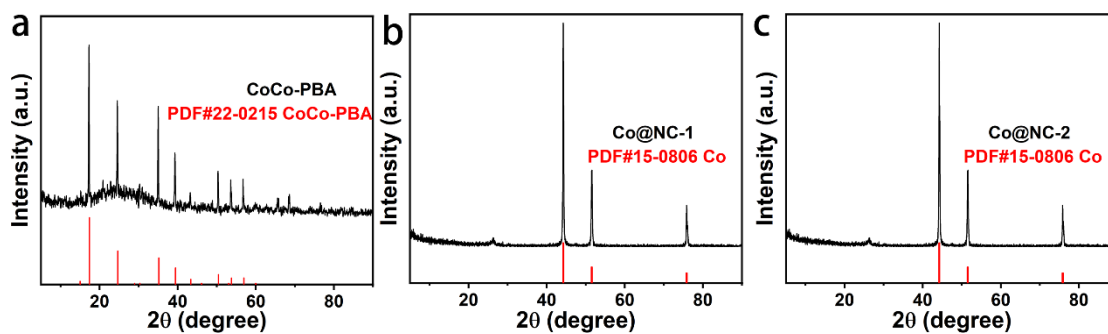

**Figure S2.** (a) XRD patterns of CoCo-PBA and CoCo-PBA simulated; (b) XRD patterns of Co@NC-1 and Co@NC-1 simulated; (c) XRD patterns of Co@NC-2 and Co@NC-2 simulated.

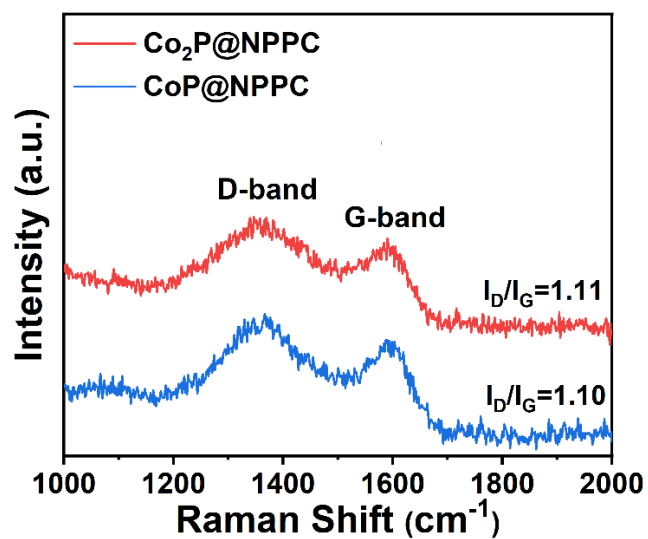

**Figure S3.** Raman spectra of Co<sub>2</sub>P@NPPC and CoP@NPPC

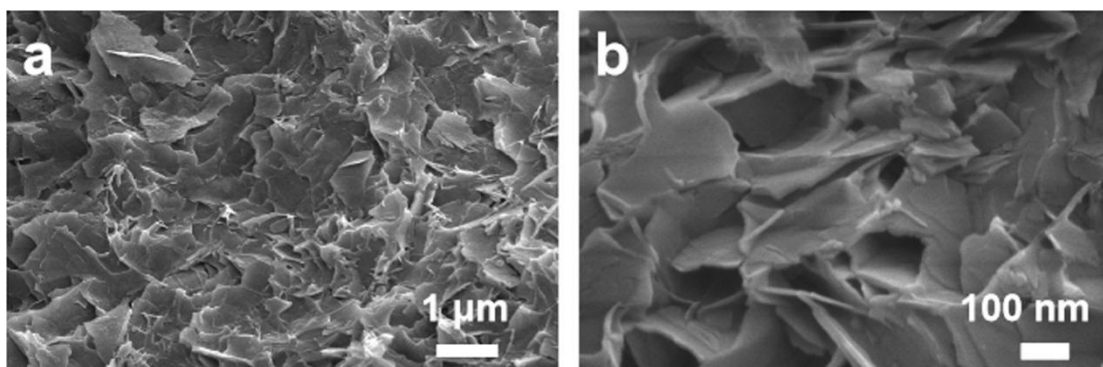

**Figure S4.** The SEM images of MPSA.

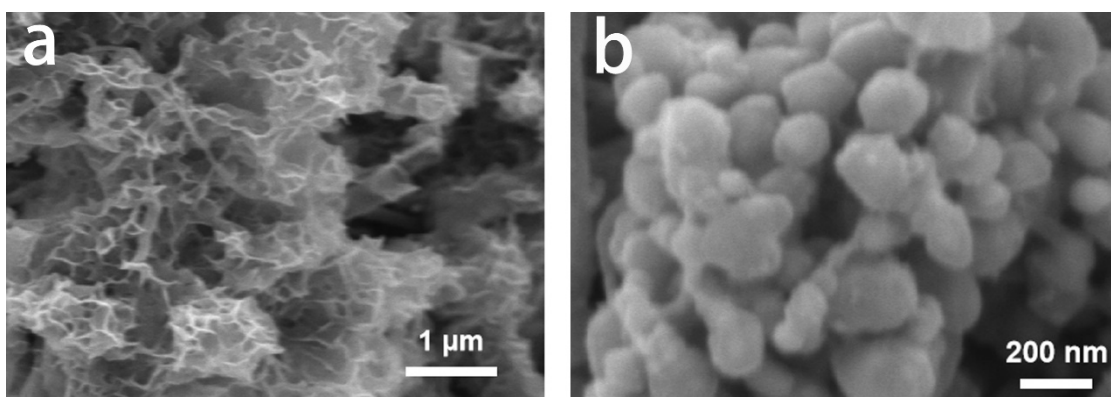

**Figure S5.** (a) The SEM images of Co@NC-1; (b) The SEM images of Co@NC-2.

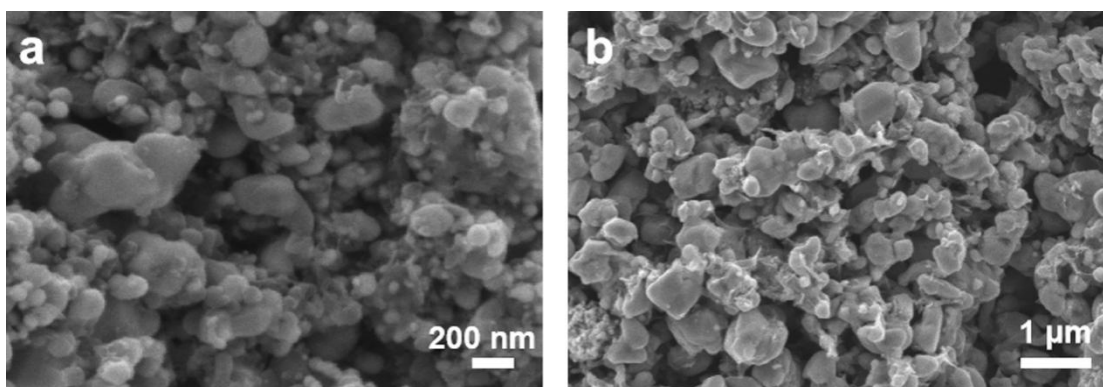

**Figure S6.** (a) The SEM images of CoP@NPPC; (b) The SEM images of Co<sub>2</sub>P@NPPC.

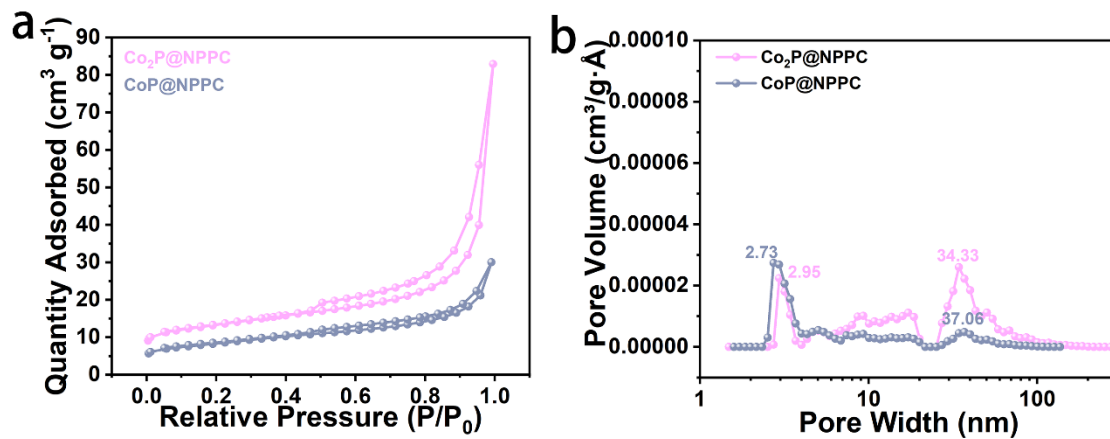

**Figure S7.** (a)  $N_2$  adsorption-desorption curves of  $Co_2P@NPPC$  and  $CoP@NPPC$ ; (b) Pore size distribution of  $Co_2P@NPPC$  and  $CoP@NPPC$ .

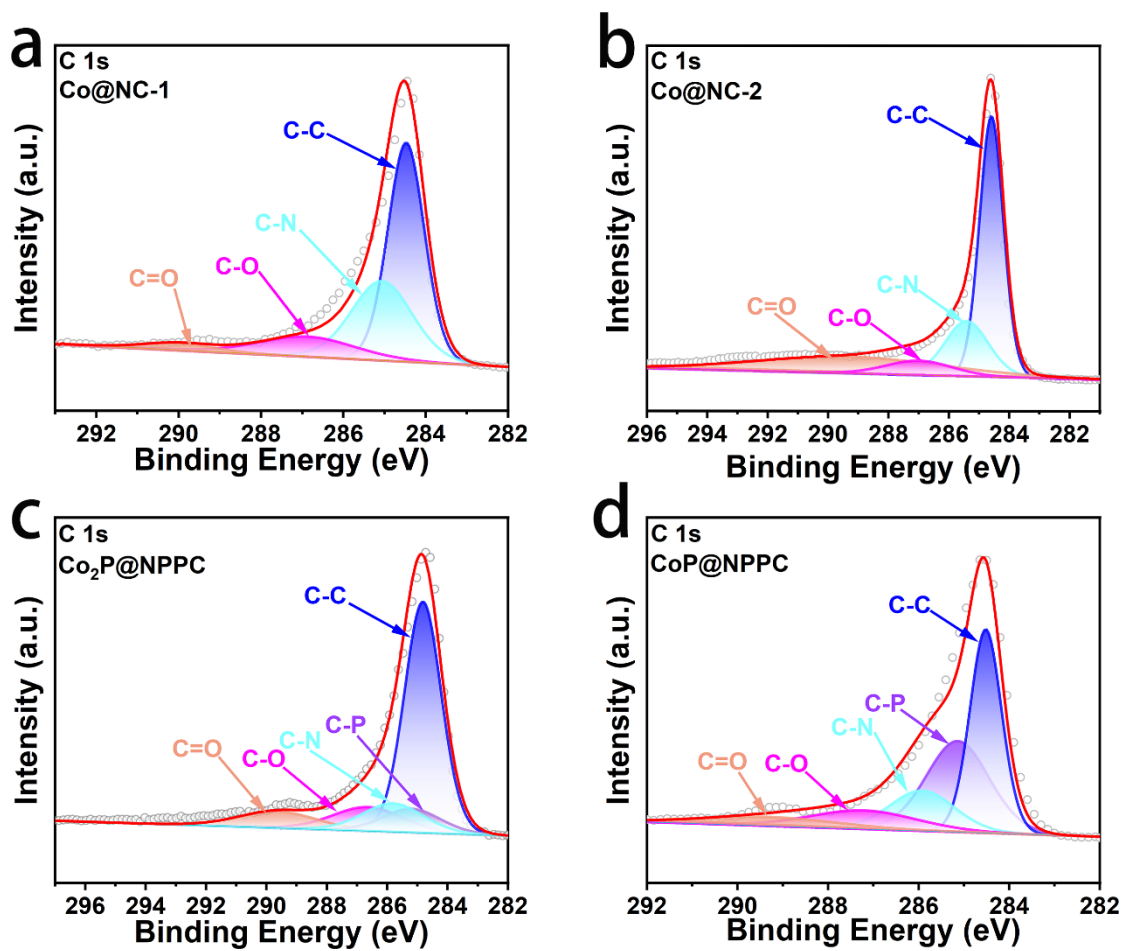

**Figure S8.** High-resolution C 1s XPS spectra of (a) Co@NC-1, (b) Co@NC-2, (c) Co<sub>2</sub>P@NPPC, (d) CoP@NPPC.

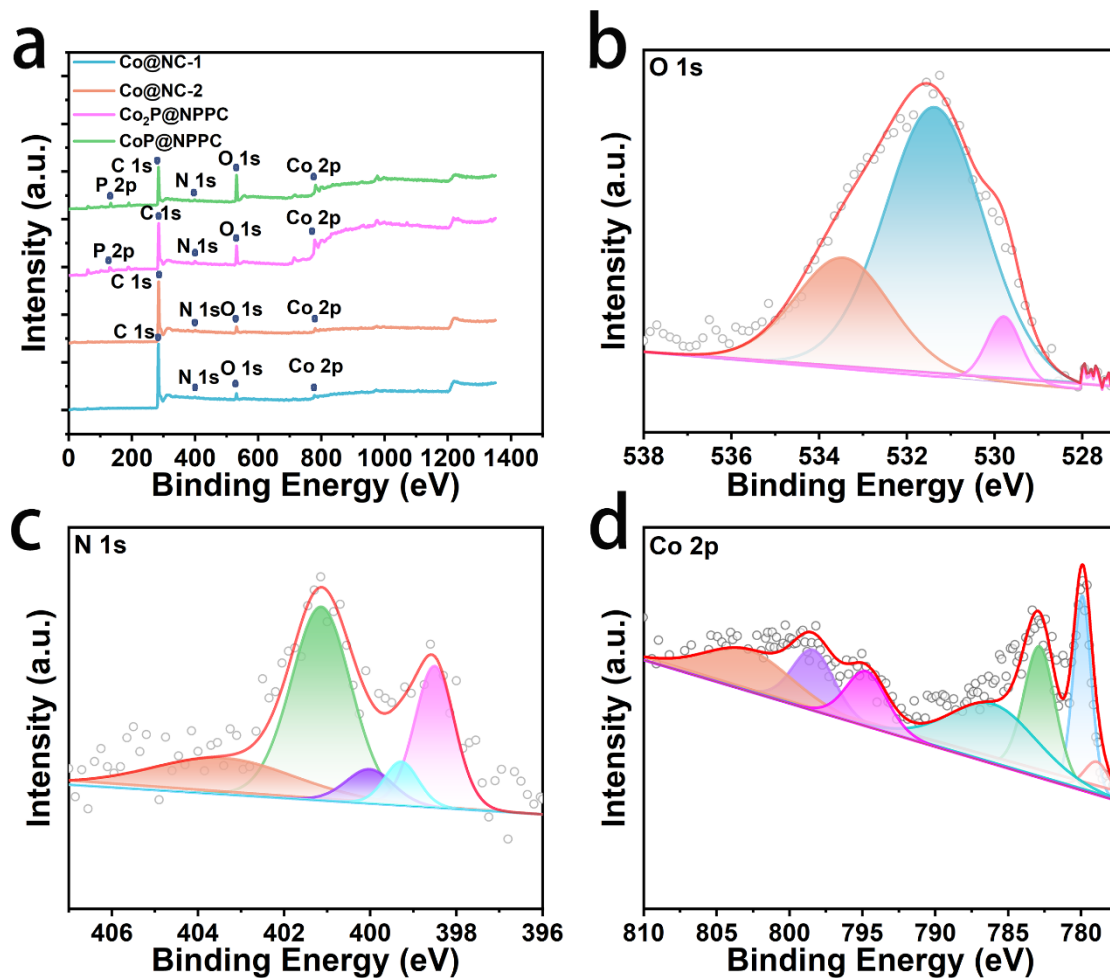

**Figure S9.** (a) XPS survey spectra of as-fabricated samples; XPS spectra of Co@NC-2. (b) O 1s, (c) N 1s, (d) Co 2p.

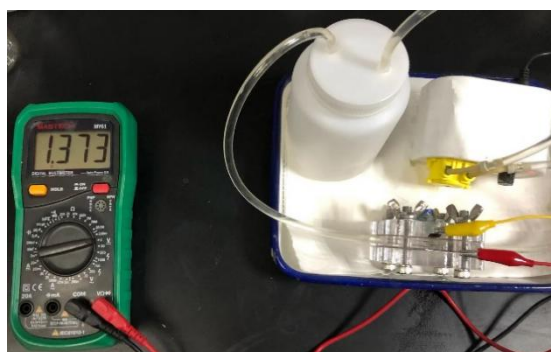

**Figure S10.** Open-circuit voltage of Pt/C+RuO<sub>2</sub>-based primary ZABs;

**Table S1.** Comparison of ORR performance of Co<sub>2</sub>P@NPPC with previously reported transition metal based electrocatalysts.

| <b>Materials</b>                         | <b>E<sub>onset</sub> (V vs. RHE)</b> | <b>E<sub>1/2</sub> (V vs. RHE)</b> | <b>Ref.</b> |
|------------------------------------------|--------------------------------------|------------------------------------|-------------|
| Co <sub>2</sub> P@NPPC                   | 0.910                                | 0.850                              | This work   |
| Co <sub>2</sub> P/NPG-900                | 0.890                                | 0.810                              | 1           |
| Cu-Co <sub>2</sub> P/CNFs                | 0.880                                | 0.792                              | 2           |
| Mn(0.1)-Co <sub>2</sub> P/NC             | 0.856                                | 0.784                              | 3           |
| CoLim-0@800                              | 0.860                                | 0.800                              | 4           |
| CoO/Co <sub>x</sub> P                    | 0.930                                | 0.860                              | 5           |
| FeS/Fe <sub>3</sub> C@NS-C-900           | 1.030                                | 0.780                              | 6           |
| Co <sub>2</sub> P/CoN-in-NCNT            | 0.960                                | 0.850                              | 7           |
| Co@IC/MoC@PC                             | 0.930                                | 0.875                              | 8           |
| Co-MOF                                   | 0.780                                | 0.700                              | 9           |
| NiCo <sub>2</sub> O <sub>4</sub> /MXene  | 0.880                                | 0.700                              | 10          |
| Mn <sub>0.9</sub> Fe <sub>2.1</sub> C/NC | 0.910                                | 0.780                              | 11          |

**Table S2.** Comparison of OER performance of Co<sub>2</sub>P@NPPC with previously reported transition metal based electrocatalysts.

| <b>Materials</b>                                                          | $\eta_{10}$ (V vs.RHE) | <b>Tafel slope (mV dec<sup>-1</sup>)</b> | <b>Ref.</b> |
|---------------------------------------------------------------------------|------------------------|------------------------------------------|-------------|
| Co <sub>2</sub> P@NPPC                                                    | 320                    | 68                                       | This work   |
| CoP@NPCSs                                                                 | 355                    | 103                                      | 12          |
| CoO/CoS <sub>2</sub>                                                      | 320                    | 77                                       | 13          |
| NiCo-air                                                                  | 510                    | 75                                       | 14          |
| FeCo@NC-g                                                                 | 347                    | 75                                       | 15          |
| CoO <sub>x</sub>                                                          | 370                    | 76                                       | 16          |
| Ag-CeO <sub>2</sub> -Co <sub>3</sub> O <sub>4</sub>                       | 340                    | 130.1                                    | 17          |
| CoFe/S-N-C                                                                | 358                    | 259                                      | 18          |
| (SmSr) <sub>0.95</sub> Co <sub>0.9</sub> Pt <sub>0.1</sub> O <sub>3</sub> | 550                    | 82                                       | 19          |
| CuCo <sub>2</sub> O <sub>4</sub> @C                                       | 327                    | 74                                       | 20          |
| ZnCo <sub>2</sub> O <sub>4</sub> @NC-CNTs                                 | 370                    | 64                                       | 21          |
| H-NSC@Co/NSC                                                              | 370                    | 61.9                                     | 22          |
| CoNi/BCF                                                                  | 370                    | 166                                      | 23          |
| CoFeP@C                                                                   | 336                    | 82.5                                     | 24          |
| Ni <sub>3</sub> Fe/N-C                                                    | 310                    | 58                                       | 25          |



**Table S3.** Comparison of Zn-air batteries assembled using Co<sub>2</sub>P@NPPC based electrocatalyst with other progressive electrode materials.

| <b>Materials</b>                       | <b>Power density ( mW cm<sup>-2</sup>)</b> | <b>Charge/discharge voltage gap (V)</b> | <b>Battery stability</b>         | <b>Ref.</b> |
|----------------------------------------|--------------------------------------------|-----------------------------------------|----------------------------------|-------------|
| Co <sub>2</sub> P@NPPC                 | 226                                        | 0.96                                    | 10 mA cm <sup>-2</sup> for 160 h | This work   |
| Fe-N <sub>x</sub> -C                   | 96.4                                       | 0.98                                    | 5 mA cm <sup>-2</sup> for 300 h  | 26          |
| SilkNC/KB                              | 91.2                                       | 0.81                                    | 10 mA cm <sup>-2</sup> for 100 h | 27          |
| NiFe@NC <sub>x</sub>                   | 82                                         | 0.78                                    | 50 mA cm <sup>-2</sup> for 200 h | 28          |
| CoN/FeN@N,S-C-800                      | 168.3                                      | 0.44                                    | 2 mA cm <sup>-2</sup> for 100 h  | 29          |
| r-CoFe <sub>2</sub> O <sub>4</sub> @DG | 155.2                                      | --                                      | 5 mA cm <sup>-2</sup> for 60 h   | 30          |
| FeCo/FeCoP@NMn-CNS-800                 | 135                                        | --                                      | 5 mA cm <sup>-2</sup> for 200 h  | 31          |
| Fe/Co-N/S-Cs                           | 102.63                                     | 0.69                                    | 5 mA cm <sup>-2</sup> for 27 h   | 32          |

## References

- 1 Q. Shao, Y. Li, X. Cui, T. Li, H.-g. Wang, Y. Li, Q. Duan, Z. Si, Metallophthalocyanine-based polymer-derived Co<sub>2</sub>P nanoparticles anchoring on doped graphene as high-efficient trifunctional electrocatalyst for Zn-air batteries and water splitting, *ACS Sustain. Chem. Eng.*, 2020, **8**, 6422-6432.
- 2 X. Sun, H. Liang, H. Yu, J. Bai, C. Li, Embedding Co<sub>2</sub>P nanoparticles in Cu doping carbon fibers for Zn-air batteries and supercapacitors, *Nanotechnology*, 2022, **33**, 135202.
- 3 J. Tong, H. Wang, L. Bo, C. Li, X. Guan, D. Kong, Y. Zhang, W. Shi, Z. Lei, Mn-doped Co<sub>2</sub>P/N-doped carbon composite materials as efficient bifunctional catalysts for rechargeable Zn-air batteries, *Mater. Res. Bulletin*, 2022, **147**, 111638.
- 4 A. Vilchez-Cozar, E. Armakola, M. Gjika, A. Visa, M. Bazaga-Garcia, P. Olivera-Pastor, D. Choquesillo-Lazarte, D. Marrero-Lopez, A. Cabeza, P.C. RM, K.D. Demadis, Exploiting the multifunctionality of M<sup>(2+)</sup>/imidazole-etidronates for proton conductivity (Zn<sup>(2+)</sup>) and electrocatalysis (Co<sup>(2+)</sup>, Ni<sup>(2+)</sup>) toward the HER, OER, and ORR, *ACS Appl. Mater. Interfaces*, 2022, **14**, 11273-11287.
- 5 Y. Niu, M. Xiao, J. Zhu, T. Zeng, J. Li, W. Zhang, D. Su, A. Yu, Z. Chen, A "trimurti" heterostructured hybrid with an intimate CoO/Co<sub>x</sub>P interface as a robust bifunctional air electrode for rechargeable Zn-air batteries, *J. Mater. Chem. A*, 2020, **8**, 9177-9184
- 6 Y.W. Li, W.J. Zhang, J. Li, H.Y. Ma, H.M. Du, D.C. Li, S.N. Wang, J.S. Zhao, J.M. Dou, L. Xu, Fe-MOF-derived efficient ORR/OER bifunctional electrocatalyst for rechargeable Zinc-air batteries, *ACS Appl. Mater. Interfaces*, 2020, **12**, 44710-44719.
- 7 Y. Guo, P. Yuan, J. Zhang, H. Xia, F. Cheng, M. Zhou, J. Li, Y. Qiao, S. Mu, Q. Xu, Co<sub>2</sub>P-CoN double active centers confined in N-doped carbon nanotube: heterostructural engineering for trifunctional catalysis toward HER, ORR, OER, and Zn-air batteries driven water splitting, *Adv. Funct. Mater.*, 2018, **28**, 1805641.
- 8 L. Zhang, Y. Zhu, Z. Nie, Z. Li, Y. Ye, L. Li, J. Hong, Z. Bi, Y. Zhou, G. Hu, Co/MoC

- nanoparticles embedded in carbon nanoboxes as robust trifunctional electrocatalysts for a Zn-air battery and water electrocatalysis, *ACS Nano*, 2021, **15**, 13399-13414.
- 9 G. Chen, J. Zhang, F. Wang, L. Wang, Z. Liao, E. Zschech, K. Mullen, X. Feng, Cobalt-based metal-organic framework nanoarrays as bifunctional oxygen electrocatalysts for rechargeable Zn-air batteries, *Chem.*, 2018, **24**, 18413-18418.
- 10 H. Lei, S. Tan, L. Ma, Y. Liu, Y. Liang, M.S. Javed, Z. Wang, Z. Zhu, W. Mai, Strongly coupled NiCo<sub>2</sub>O<sub>4</sub> nanocrystal/MXene hybrid through in situ Ni/Co-F bonds for efficient wearable Zn-air batteries, *ACS Appl. Mater. Interfaces*, 2020, **12**, 44639-44647.
- 11 C. Lin, X. Li, S.S. Shinde, D.-H. Kim, X. Song, H. Zhang, J.-H. Lee, Long-life rechargeable Zn air battery based on binary metal carbide armored by nitrogen-doped carbon, *ACS Appl. Energy. Mater.*, 2019, **2**, 1747-1755.
- 12 K. Wu, Z. Chen, W.C. Cheong, S. Liu, W. Zhu, X. Cao, K. Sun, Y. Lin, L. Zheng, W. Yan, Y. Pan, D. Wang, Q. Peng, C. Chen, Y. Li, Toward bifunctional overall water splitting electrocatalyst: general preparation of transition metal phosphide nanoparticles decorated N-doped porous carbon spheres, *ACS Appl. Mater. Interfaces*, 2018, **10**, 44201-44208.
- 13 T. Qin, Y. Ding, R. Zhang, X. Gao, Z. Tang, Y. Liu, D. Gao, Bifunctional CoO/CoS<sub>2</sub> hierarchical nanospheres electrocatalyst for rechargeable Zn-air battery, *FlatChem*, 2022 **32**, 100343.
- 14 W. Liu, J. Bao, L. Xu, M. Guan, Z. Wang, J. Qiu, Y. Huang, J. Xia, Y. Lei, H. Li, NiCo<sub>2</sub>O<sub>4</sub> ultrathin nanosheets with oxygen vacancies as bifunctional electrocatalysts for Zn-air battery, *Appl. Sur. Sci.*, 2019, **478**, 552-559.
- 15 L.-B. Huang, L. Zhao, Y. Zhang, H. Luo, X. Zhang, J. Zhang, H. Pan, J.-S. Hu, Engineering carbon-shells of M@NC bifunctional oxygen electrocatalyst towards stable aqueous rechargeable Zn-air batteries, *Chem. Eng. J.*, 2021, **418**, 129409.
- 16 T. Zhou, W. Xu, N. Zhang, Z. Du, C. Zhong, W. Yan, H. Ju, W. Chu, H. Jiang, C. Wu, Y. Xie, Ultrathin cobalt oxide layers as electrocatalysts for high-performance flexible Zn-air batteries, *Adv. Mater.*, 2019, **31**, 1807468.
- 17 T. Li, Z. He, X. Liu, M. Jiang, Q. Liao, R. Ding, S. Liu, C. Zhao, W. Guo, S. Zhang,

- H. He, Interface interaction of Ag-CeO<sub>2</sub>-Co<sub>3</sub>O<sub>4</sub> facilitate ORR/OER activity for Zn-air battery, *Surfaces and Interfaces*, 2022, **33**, 102270.
- 18 G. Li, Y. Tang, T. Fu, Y. Xiang, Z. Xiong, Y. Si, C. Guo, Z. Jiang, S, N co-doped carbon nanotubes coupled with CoFe nanoparticles as an efficient bifunctional ORR/OER electrocatalyst for rechargeable Zn-air batteries, *Chem. Eng. J.*, 2022, **429**, 132174.
- 19 C. Wang, B. Hou, X. Wang, Z. Yu, D. Luo, M. Gholizadeh, X. Fan, High-performance a-site deficient perovskite electrocatalyst for rechargeable Zn-air battery, *Catal.*, 2022, **12**, 703.
- 20 X. Wang, Y. Li, T. Jin, J. Meng, L. Jiao, M. Zhu, J. Chen, Electrospun thin-walled CuCo<sub>2</sub>O<sub>4</sub>@C nanotubes as bifunctional oxygen electrocatalysts for rechargeable Zn-air batteries, *Nano. Lett.*, 2017, **17**, 7989-7994.
- 21 L. Yan, Z. Xu, W. Hu, J. Ning, Y. Zhong, Y. Hu, Formation of sandwiched leaf-like CNTs-Co/ZnCo<sub>2</sub>O<sub>4</sub>@NC-CNTs nanohybrids for high-power-density rechargeable Zn-air batteries, *Nano. Energy*, 2021, **82**, 105710.
- 22 W. Li, J. Wang, J. Chen, K. Chen, Z. Wen, A. Huang, Core-shell carbon-based bifunctional electrocatalysts derived from COF@MOF hybrid for advanced rechargeable Zn-air batteries, *Small*, 2022, **18**, 2202018.
- 23 W. Wan, X. Liu, H. Li, X. Peng, D. Xi, J. Luo, 3D carbon framework-supported CoNi nanoparticles as bifunctional oxygen electrocatalyst for rechargeable Zn-air batteries, *Appl. Catal. B: Environ.*, 2019, **240**, 193-200.
- 24 L. Gao, S. Chang, Z. Zhang, High-quality CoFeP nanocrystal/N, P dual-doped carbon composite as a novel bifunctional electrocatalyst for rechargeable Zn-air battery, *ACS Appl. Mater. Interfaces*, 2021, **13**, 22282-22291.
- 25 P. Sun, Z. Zuo, M. He, L. Yang, D. Zhang, N. Huang, Z. Chen, Y. Sun, X. Sun, N-doped carbon sheets loaded with well-dispersed Ni<sub>3</sub>Fe nanoparticles as bifunctional oxygen electrode for rechargeable Zn-air battery, *Journal of Electroanalytical Chemistry*, 2019, **851**, 113418.
- 26 C. Wang, N.-H. Xie, Y. Zhang, Z. Huang, K. Xia, H. Wang, S. Guo, B.-Q. Xu, Y. Zhang, Silk-derived highly active oxygen electrocatalysts for flexible and

- rechargeable Zn–air batteries, *Chemistry of Materials*, 2019, **31**, 1023-1029.
- 27 J. Han, X. Meng, L. Lu, J. Bian, Z. Li, C. Sun, Single-atom Fe-N<sub>x</sub>-C as an efficient electrocatalyst for Zinc–air batteries, *Adv. Funct. Mater.*, 2019, **29**, 1808872.
- 28 J. Zhu, M. Xiao, Y. Zhang, Z. Jin, Z. Peng, C. Liu, S. Chen, J. Ge, W. Xing, Metal–organic framework-induced synthesis of ultrasmall encased NiFe nanoparticles coupling with graphene as an efficient oxygen electrode for a rechargeable Zn–air battery, *ACS Catal.*, 2016, **6**, 6335-6342.
- 29 S. Ren, X. Duan, M. Lei, S. Liang, M. Zhang, H. Zheng, Energetic MOF-derived cobalt/iron nitrides embedded into N, S-codoped carbon nanotubes as superior bifunctional oxygen catalysts for Zn–air batteries, *Appl. Sur. Sci.*, 2021, **569**, 151030.
- 30 X. Wang, L. Zhuang, Y. Jia, L. Zhang, Q. Yang, W. Xu, D. Yang, X. Yan, L. Zhang, Z. Zhu, C.L. Brown, P. Yuan, X. Yao, One-step in-situ synthesis of vacancy-rich CoFe<sub>2</sub>O<sub>4</sub>@defective graphene hybrids as bifunctional oxygen electrocatalysts for rechargeable Zn-air batteries, *Chem. Res. Chin. Univer.*, 2020, **36**, 479-487.
- 31 Y.P. Chen, S.Y. Lin, R.M. Sun, A.J. Wang, L. Zhang, X. Ma, J.J. Feng, FeCo/FeCoP encapsulated in N, Mn-codoped three-dimensional fluffy porous carbon nanostructures as highly efficient bifunctional electrocatalyst with multi-components synergistic catalysis for ultra-stable rechargeable Zn-air batteries, *J. Colloid Interface Sci.*, 2022, **605**, 451-462.
- 32 C. Li, H. Liu, Z. Yu, Novel and multifunctional inorganic mixing salt-templated 2D ultrathin Fe/Co-N/S-carbon nanosheets as effectively bifunctional electrocatalysts for Zn-air batteries, *Appl. Catal. B: Environ.*, 2019, **241**, 95-103.
